# Supplementary material for: Transcriptional Profiling and Deriving a Seven-Gene Signature That Discriminates Active and Latent Tuberculosis: An Integrative Bioinformatics Approach
Source: MDPI journal article supplement (doi:10.3390/genes13040616), 2022-03-29
Supplement: s1 [file s1]

## Supplementary Figures

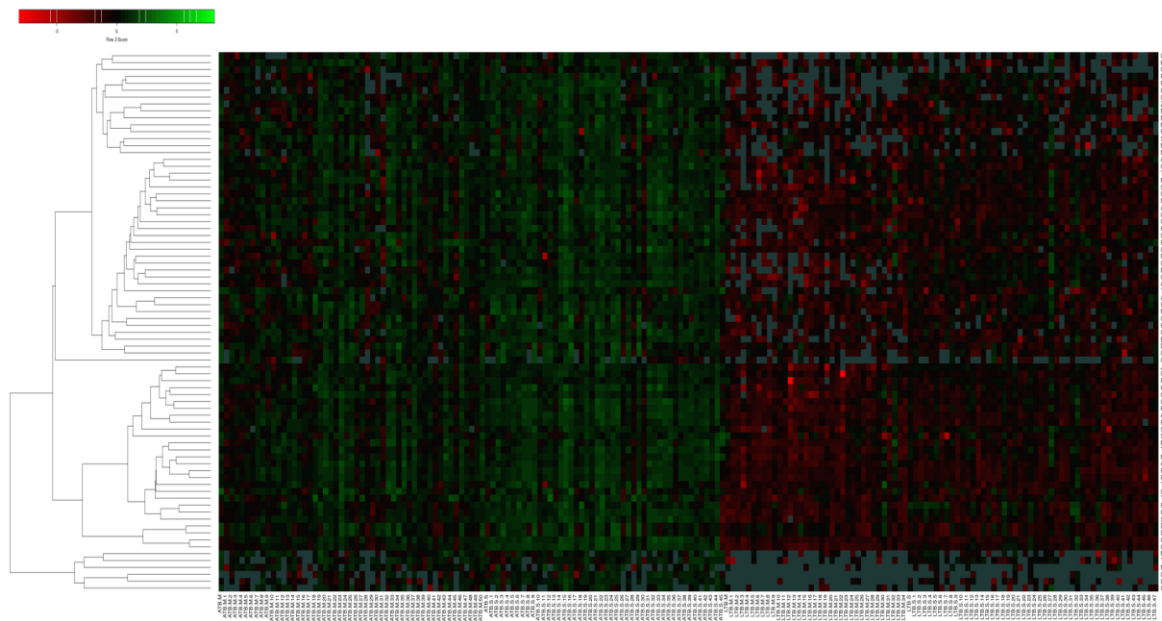

**Figure S1.** Results of differential gene expression pattern between ATB and LTBI. the expression levels are scaled from dark red (low expression) to dark green (high expression).

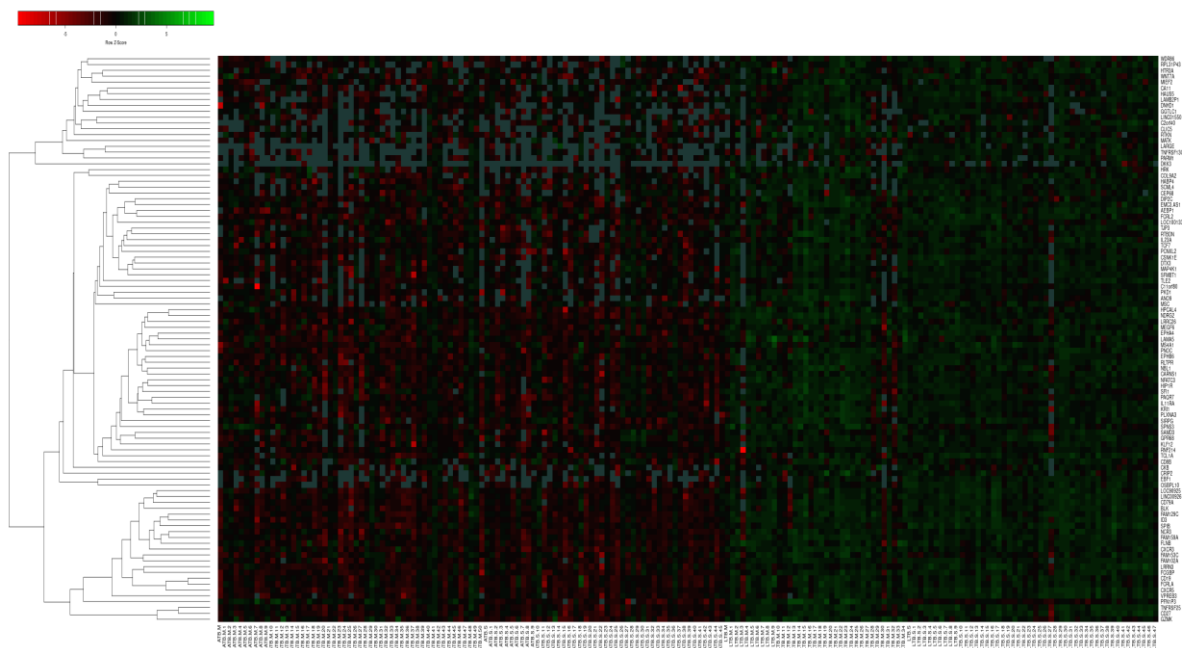

**Figure S2.** Heatmap of downregulated genes in ATB vs LTBI. The expression levels are scaled from dark red (low expression) to dark green (high expression).
