# Supplementary material for: Transcriptional Profiling and Deriving a Seven-Gene Signature That Discriminates Active and Latent Tuberculosis: An Integrative Bioinformatics Approach
Source: MDPI journal article supplement (doi:10.3390/genes13040616), 2022-03-29
Supplement: s1 [file s1]

## Supplementary Table S1

ATB vs LTB up regulated genes common to South Africa & Malawi.

| S.no | Gene             | Probset ID   | Mean fold change | Mean P-value |
|------|------------------|--------------|------------------|--------------|
| 1.   | <i>FCGR1A</i>    | ILMN_2176063 | 8.20             | 1E-07        |
| 2.   | <i>FCGR1B</i>    | ILMN_2391051 | 9.80             | 1E-07        |
| 3.   | <i>FCGR1C</i>    | ILMN_3247506 | 6.11             | 1E-07        |
| 4.   | <i>BATF2</i>     | ILMN_1690241 | 12.4             | 1E-07        |
| 5.   | <i>GBP1</i>      | ILMN_2148785 | 3.63             | 1E-07        |
| 6.   | <i>ANKRD22</i>   | ILMN_1799848 | 10.25            | 1E-07        |
| 7.   | <i>GBP5</i>      | ILMN_2114568 | 3.53             | 1E-07        |
| 8.   | <i>AIM2</i>      | ILMN_1681301 | 4.10             | 1E-07        |
| 9.   | <i>GBP6</i>      | ILMN_1756953 | 7.43             | 1E-07        |
| 10.  | <i>CASP4</i>     | ILMN_1778059 | 4.40             | 1E-07        |
| 11.  | <i>SMARCD3</i>   | ILMN_2408987 | 4.43             | 1E-07        |
| 12.  | <i>TNFAIP6</i>   | ILMN_1785732 | 3.47             | 1E-07        |
| 13.  | <i>C1QB</i>      | ILMN_1796409 | 11.69            | 1E-07        |
| 14.  | <i>SERPING1</i>  | ILMN_1670305 | 8.10             | 1E-07        |
| 15.  | <i>CARD16</i>    | ILMN_1726591 | 3.91             | 1E-07        |
| 16.  | <i>KCNJ15</i>    | ILMN_2396903 | 3.45             | 1E-07        |
| 17.  | <i>FAM198B</i>   | ILMN_1672124 | 3.48             | 1E-07        |
| 18.  | <i>ANXA3</i>     | ILMN_1694548 | 4.40             | 1E-07        |
| 19.  | <i>MTHFD2</i>    | ILMN_2405521 | 3.01             | 1E-07        |
| 20.  | <i>CACNA1E</i>   | ILMN_1664047 | 5.80             | 1E-07        |
| 21.  | <i>CEACAM1</i>   | ILMN_1664330 | 3.18             | 1E-07        |
| 22.  | <i>TDRD9</i>     | ILMN_2169490 | 4.11             | 1.5E-07      |
| 23.  | <i>CARD17</i>    | ILMN_3238525 | 6.23             | 1E-07        |
| 24.  | <i>MCTP1</i>     | ILMN_1654685 | 3.53             | 1E-07        |
| 25.  | <i>TMEM158</i>   | ILMN_1792455 | 2.98             | 1E-07        |
| 26.  | <i>TLR2</i>      | ILMN_1772387 | 3.50             | 1E-07        |
| 27.  | <i>MMRN1</i>     | ILMN_1660114 | 4.52             | 1E-07        |
| 28.  | <i>IGF2BP3</i>   | ILMN_1807423 | 4.52             | 1E-07        |
| 29.  | <i>KREMEN1</i>   | ILMN_1772697 | 6.51             | 1E-07        |
| 30.  | <i>HIST2H2AB</i> | ILMN_1747589 | 4.63             | 1E-07        |
| 31.  | <i>MGST1</i>     | ILMN_1781952 | 3.12             | 1E-07        |
| 32.  | <i>NRG1</i>      | ILMN_1737252 | 3.37             | 7E-07        |
| 33.  | <i>CASP5</i>     | ILMN_1722158 | 5.81             | 1E-07        |
| 34.  | <i>JAK2</i>      | ILMN_1683178 | 3.12             | 1E-07        |
| 35.  | <i>GAS6</i>      | ILMN_1784749 | 3.35             | 1E-07        |
| 36.  | <i>CHMP5</i>     | ILMN_2094166 | 3.45             | 1E-07        |
| 37.  | <i>FAM20A</i>    | ILMN_1812091 | 4.27             | 1E-07        |
| 38.  | <i>MCEMP1</i>    | ILMN_1762713 | 3.87             | 1E-07        |
| 39.  | <i>P2RY14</i>    | ILMN_1764036 | 5.28             | 1E-07        |
| 40.  | <i>MAPK14</i>    | ILMN_2388090 | 3.84             | 1E-07        |
| 41.  | <i>C1QC</i>      | ILMN_1785902 | 5.89             | 1E-07        |
| 42.  | <i>IFIT3</i>     | ILMN_1664543 | 3.58             | 1E-07        |
| 43.  | <i>SELP</i>      | ILMN_1715417 | 4.09             | 1E-07        |
| 44.  | <i>TMEM144</i>   | ILMN_1708110 | 3.68             | 8.5E-07      |
| 45.  | <i>HIST1H4H</i>  | ILMN_1751120 | 3.53             | 1E-07        |
| 46.  | <i>NAIP</i>      | ILMN_1760189 | 3.91             | 1E-07        |
| 47.  | <i>ASGR2</i>     | ILMN_1694966 | 3.70             | 1E-07        |
| 48.  | <i>APOL6</i>     | ILMN_1687201 | 3.29             | 1E-07        |
| 49.  | <i>CAMP</i>      | ILMN_1688580 | 3.05             | 1E-07        |
| 50.  | <i>CLEC4D</i>    | ILMN_1808979 | 3.32             | 1.05E-06     |
| 51.  | <i>METTL7B</i>   | ILMN_2064725 | 4.70             | 1E-07        |
| 52.  | <i>FCAR</i>      | ILMN_2365091 | 3.59             | 1E-07        |
| 53.  | <i>HP</i>        | ILMN_1812433 | 4.77             | 1E-07        |
| 54.  | <i>MS4A4A</i>    | ILMN_2370336 | 3.53             | 6E-07        |

|      |                     |              |       |          |
|------|---------------------|--------------|-------|----------|
| 55.  | <i>GPR84</i>        | ILMN_1785345 | 3.16  | 1E-07    |
| 56.  | <i>MYL9</i>         | ILMN_1776953 | 5.67  | 1E-07    |
| 57.  | <i>ITGB3</i>        | ILMN_1733324 | 3.38  | 1E-07    |
| 58.  | <i>CR1</i>          | ILMN_1767193 | 3.48  | 1E-07    |
| 59.  | <i>RSAD2</i>        | ILMN_1657871 | 3.27  | 1E-06    |
| 60.  | <i>CEACAM8</i>      | ILMN_1806056 | 5.14  | 3E-07    |
| 61.  | <i>FCGR2C</i>       | ILMN_2331121 | 3.39  | 1E-07    |
| 62.  | <i>RNU4ATAC</i>     | ILMN_3240594 | 3.34  | 6.5E-07  |
| 63.  | <i>ZAK</i>          | ILMN_1698803 | 3.39  | 1E-07    |
| 64.  | <i>CEACAM6</i>      | ILMN_1712522 | 3.82  | 3.5E-07  |
| 65.  | <i>CD177</i>        | ILMN_3251610 | 4.94  | 2E-07    |
| 66.  | <i>NDUFAF3</i>      | ILMN_1702120 | 3.89  | 1E-07    |
| 67.  | <i>SLPI</i>         | ILMN_2114720 | 3.49  | 3E-07    |
| 68.  | <i>TIMM10</i>       | ILMN_1765332 | 3.02  | 2E-07    |
| 69.  | <i>GADD45G</i>      | ILMN_1651498 | 3.10  | 2.5E-07  |
| 70.  | <i>OLFM4</i>        | ILMN_2116877 | 5.23  | 4.5E-06  |
| 71.  | <i>SIGLEC5</i>      | ILMN_1740298 | 3.25  | 4.5E-07  |
| 72.  | <i>DEFA4</i>        | ILMN_1753347 | 4.54  | 6.5E-07  |
| 73.  | <i>IL27</i>         | ILMN_1753758 | 4.73  | 8.5E-07  |
| 74.  | <i>MYOF</i>         | ILMN_2370976 | 4.19  | 7.7E-06  |
| 75.  | <i>AQP10</i>        | ILMN_2090004 | 3.33  | 3.5E-06  |
| 76.  | <i>CD274</i>        | ILMN_1701914 | 4.77  | 1.2E-05  |
| 77.  | <i>DEFA1B</i>       | ILMN_2102721 | 3.45  | 2.3E-05  |
| 78.  | <i>DEFA3</i>        | ILMN_2165289 | 3.23  | 2.6E-05  |
| 79.  | <i>LHFPL2</i>       | ILMN_1747744 | 2.855 | 1.00E-07 |
| 80.  | <i>LOC728744</i>    | ILMN_1654389 | 7.795 | 1.00E-07 |
| 81.  | <i>PSTPIP2</i>      | ILMN_1713058 | 2.49  | 1.00E-07 |
| 82.  | <i>TLR5</i>         | ILMN_1722981 | 2.54  | 1.00E-07 |
| 83.  | <i>DTX3L</i>        | ILMN_1784380 | 2.275 | 1.65E-06 |
| 84.  | <i>GK</i>           | ILMN_2393296 | 2.655 | 1.00E-07 |
| 85.  | <i>LAP3P2</i>       | ILMN_3295494 | 2.855 | 1.00E-07 |
| 86.  | <i>LOC440731</i>    | ILMN_1683250 | 2.48  | 1.00E-07 |
| 87.  | <i>PARP9</i>        | ILMN_2053527 | 2.155 | 1.00E-07 |
| 88.  | <i>GRAMD1B</i>      | ILMN_3237376 | 3.285 | 1.22E-05 |
| 89.  | <i>HIST1H3D</i>     | ILMN_1721127 | 2.635 | 1.00E-07 |
| 90.  | <i>ATF3</i>         | ILMN_2374865 | 2.605 | 1.68E-05 |
| 91.  | <i>ODF3B</i>        | ILMN_2209614 | 2.03  | 1.24E-05 |
| 92.  | <i>HIST2H2AA3</i>   | ILMN_1659047 | 2.275 | 1.00E-07 |
| 93.  | <i>LMNB1</i>        | ILMN_2126706 | 2.6   | 1.00E-07 |
| 94.  | <i>SLC26A8</i>      | ILMN_1755843 | 3.845 | 1.00E-07 |
| 95.  | <i>TIFA</i>         | ILMN_1686454 | 2.655 | 1.47E-04 |
| 96.  | <i>APOL1</i>        | ILMN_1761793 | 2.92  | 4.69E-05 |
| 97.  | <i>HIST2H2AC</i>    | ILMN_1768973 | 2.48  | 1.00E-07 |
| 98.  | <i>HIST2H2AA4</i>   | ILMN_3242900 | 2.245 | 1.00E-07 |
| 99.  | <i>HIST1H2BD</i>    | ILMN_1758623 | 2.475 | 5.50E-07 |
| 100. | <i>P2RY13</i>       | ILMN_1664525 | 2.57  | 1.00E-07 |
| 101. | <i>LAP3</i>         | ILMN_1683792 | 2.475 | 1.00E-07 |
| 102. | <i>C5</i>           | ILMN_1746819 | 2.24  | 1.00E-07 |
| 103. | <i>ADCY3</i>        | ILMN_1676893 | 2.49  | 1.00E-07 |
| 104. | <i>WDFY3</i>        | ILMN_1697493 | 2.075 | 7.00E-07 |
| 105. | <i>NLRC4</i>        | ILMN_1796976 | 2.64  | 1.00E-07 |
| 106. | <i>LOC648984</i>    | ILMN_1801254 | 2.59  | 1.00E-07 |
| 107. | <i>LOC100130828</i> | ILMN_3256712 | 2.63  | 1.00E-07 |
| 108. | <i>TRIM22</i>       | ILMN_1779252 | 2.165 | 1.00E-07 |
| 109. | <i>IFITM3</i>       | ILMN_1805750 | 2.715 | 1.00E-07 |
| 110. | <i>RTP4</i>         | ILMN_2173975 | 2.675 | 5.20E-06 |
| 111. | <i>HIST1H4D</i>     | ILMN_1676580 | 2.9   | 3.42E-05 |
| 112. | <i>LOC648710</i>    | ILMN_1710698 | 2.125 | 4.50E-06 |

|      |                     |              |       |           |
|------|---------------------|--------------|-------|-----------|
| 113. | <i>SI00A8</i>       | ILMN_1729801 | 2.36  | 1.00E-07  |
| 114. | <i>HPSE</i>         | ILMN_1779547 | 2.005 | 1.00E-07  |
| 115. | <i>PLSCR1</i>       | ILMN_1745242 | 2.63  | 1.00E-07  |
| 116. | <i>C1QA</i>         | ILMN_1737918 | 2.435 | 1.00E-07  |
| 117. | <i>C2</i>           | ILMN_1710740 | 2.94  | 1.00E-07  |
| 118. | <i>LOC653610</i>    | ILMN_1695435 | 2.72  | 1.00E-07  |
| 119. | <i>GALNT14</i>      | ILMN_1722524 | 3.615 | 5.00E-07  |
| 120. | <i>TCN2</i>         | ILMN_1740572 | 2.37  | 1.00E-07  |
| 121. | <i>CD36</i>         | ILMN_1784863 | 2.795 | 1.00E-07  |
| 122. | <i>LOC388572</i>    | ILMN_3294156 | 3.065 | 3.77E-05  |
| 123. | <i>HCAR2</i>        | ILMN_1750497 | 2.58  | 3.00E-07  |
| 124. | <i>EPSTI1</i>       | ILMN_2388547 | 2.62  | 1.00E-07  |
| 125. | <i>LRG1</i>         | ILMN_1805228 | 2.08  | 2.00E-07  |
| 126. | <i>LOC651738</i>    | ILMN_1674789 | 2.135 | 1.57E-05  |
| 127. | <i>CDK5RAP2</i>     | ILMN_2415529 | 2.385 | 1.50E-04  |
| 128. | <i>ADM</i>          | ILMN_1708934 | 2.235 | 1.00E-07  |
| 129. | <i>FAM26F</i>       | ILMN_2066849 | 2.78  | 1.00E-07  |
| 130. | <i>CREB5</i>        | ILMN_1728677 | 2.175 | 1.00E-07  |
| 131. | <i>LIMK2</i>        | ILMN_2367671 | 2.565 | 1.00E-07  |
| 132. | <i>NOD2</i>         | ILMN_1762594 | 1.945 | 2.00E-06  |
| 133. | <i>DDX60L</i>       | ILMN_3243928 | 2.425 | 1.00E-07  |
| 134. | <i>GCH1</i>         | ILMN_1812759 | 1.99  | 1.00E-07  |
| 135. | <i>LOC100170939</i> | ILMN_3238814 | 2.5   | 1.00E-07  |
| 136. | <i>LOC644615</i>    | ILMN_1784005 | 2.37  | 5.10E-06  |
| 137. | <i>MIR21</i>        | ILMN_3310840 | 2.63  | 1.00E-07  |
| 138. | <i>CCRL2</i>        | ILMN_3190833 | 2.47  | 5.00E-07  |
| 139. | <i>LOC728519</i>    | ILMN_1679620 | 2.63  | 1.00E-07  |
| 140. | <i>VNN1</i>         | ILMN_1674574 | 2.695 | 1.00E-07  |
| 141. | <i>LOC100132287</i> | ILMN_3234783 | 2.175 | 0.0001902 |
| 142. | <i>SLAMF8</i>       | ILMN_1667224 | 2.255 | 0.0003901 |
| 143. | <i>IL15</i>         | ILMN_2273053 | 2.15  | 0.0000241 |
| 144. | <i>TXN</i>          | ILMN_1680314 | 2.02  | 1.00E-07  |
| 145. | <i>SLC22A4</i>      | ILMN_2050911 | 2.09  | 1.00E-07  |
| 146. | <i>BMX</i>          | ILMN_1796138 | 2.2   | 1.21E-05  |
| 147. | <i>DHRS9</i>        | ILMN_1733998 | 2.285 | 1.00E-07  |
| 148. | <i>DSC2</i>         | ILMN_1663119 | 2.69  | 1.00E-07  |
| 149. | <i>GPR141</i>       | ILMN_2092333 | 2.465 | 1.00E-07  |
| 150. | <i>ZDHHC19</i>      | ILMN_1766896 | 2.8   | 1.63E-05  |
| 151. | <i>HCAR3</i>        | ILMN_1677693 | 2.71  | 1.00E-07  |
| 152. | <i>KREMEN2</i>      | ILMN_1761321 | 2.135 | 2.40E-06  |
| 153. | <i>IL15RA</i>       | ILMN_1665682 | 2.16  | 1.10E-04  |
| 154. | <i>RTN2</i>         | ILMN_1749115 | 1.935 | 1.00E-07  |
| 155. | <i>LOC728093</i>    | ILMN_3231554 | 5.095 | 8.00E-07  |
| 156. | <i>RAB20</i>        | ILMN_1708881 | 2.5   | 1.23E-05  |
| 157. | <i>NAMPT</i>        | ILMN_1753111 | 2.505 | 7.00E-07  |
| 158. | <i>ANKRD9</i>       | ILMN_2048607 | 2.11  | 1.82E-04  |
| 159. | <i>FZD2</i>         | ILMN_1653711 | 2.06  | 7.70E-06  |
| 160. | <i>ITGA2B</i>       | ILMN_1721888 | 2.825 | 3.07E-05  |
| 161. | <i>SLC6A12</i>      | ILMN_1780831 | 2.97  | 1.00E-07  |
| 162. | <i>PRRG4</i>        | ILMN_1661809 | 2.685 | 1.00E-07  |
| 163. | <i>DDIAS</i>        | ILMN_1790100 | 2.09  | 1.00E-07  |
| 164. | <i>SUCNR1</i>       | ILMN_1681601 | 2.23  | 4.50E-06  |
| 165. | <i>NTNG2</i>        | ILMN_1806448 | 2.695 | 2.92E-05  |
| 166. | <i>MARCO</i>        | ILMN_1731503 | 2.16  | 3.00E-07  |
| 167. | <i>SAMD4A</i>       | ILMN_2119297 | 1.91  | 1.67E-05  |
| 168. | <i>HIST1H4E</i>     | ILMN_1681542 | 2.535 | 2.10E-06  |
| 169. | <i>LILRA5</i>       | ILMN_1726545 | 2.045 | 1.00E-07  |
| 170. | <i>SLITRK4</i>      | ILMN_2199768 | 2.55  | 1.00E-07  |

|      |                      |              |       |           |
|------|----------------------|--------------|-------|-----------|
| 171. | <i>DNAJC25-GNG10</i> | ILMN_1767809 | 2.64  | 1.00E-07  |
| 172. | <i>ALPL</i>          | ILMN_1701603 | 1.925 | 3.59E-05  |
| 173. | <i>AP5B1</i>         | ILMN_1717594 | 1.95  | 2.81E-05  |
| 174. | <i>TCN1</i>          | ILMN_1768469 | 2.625 | 5.00E-07  |
| 175. | <i>DKFZP434B2016</i> | ILMN_1752798 | 1.935 | 1.40E-06  |
| 176. | <i>GNG10</i>         | ILMN_1757074 | 2     | 1.40E-06  |
| 177. | <i>MPO</i>           | ILMN_1705183 | 2.32  | 3.30E-06  |
| 178. | <i>PPP1R3B</i>       | ILMN_1712236 | 2.225 | 7.00E-07  |
| 179. | <i>CCR2</i>          | ILMN_2276996 | 2.135 | 1.00E-07  |
| 180. | <i>FCGR2A</i>        | ILMN_1706523 | 1.755 | 1.22E-05  |
| 181. | <i>LOC401281</i>     | ILMN_1797409 | 2.2   | 5.00E-04  |
| 182. | <i>TREML1</i>        | ILMN_1690783 | 2.33  | 3.30E-06  |
| 183. | <i>LOC645822</i>     | ILMN_3216298 | 2.015 | 5.91E-05  |
| 184. | <i>FPR2</i>          | ILMN_2392569 | 2.075 | 7.00E-07  |
| 185. | <i>INSL3</i>         | ILMN_2226271 | 2.425 | 4.99E-04  |
| 186. | <i>LOC388444</i>     | ILMN_3237428 | 2.545 | 4.15E-04  |
| 187. | <i>COL17A1</i>       | ILMN_1651282 | 2.205 | 3.24E-04  |
| 188. | <i>GLRXP3</i>        | ILMN_3280402 | 2.43  | 1.00E-07  |
| 189. | <i>SLC2A14</i>       | ILMN_1668865 | 2.535 | 1.00E-07  |
| 190. | <i>CSTA</i>          | ILMN_1669888 | 2.91  | 1.00E-07  |
| 191. | <i>LOC643313</i>     | ILMN_1789965 | 1.82  | 5.87E-05  |
| 192. | <i>ST3GAL4</i>       | ILMN_2204545 | 1.82  | 1.50E-04  |
| 193. | <i>SOD2</i>          | ILMN_2406501 | 1.79  | 3.57E-05  |
| 194. | <i>LOC100134660</i>  | ILMN_3247661 | 1.955 | 1.37E-05  |
| 195. | <i>NBN</i>           | ILMN_2358041 | 2.195 | 1.50E-06  |
| 196. | <i>TMEM167A</i>      | ILMN_3251560 | 2.465 | 1.00E-07  |
| 197. | <i>LY96</i>          | ILMN_1724533 | 2.36  | 1.00E-07  |
| 198. | <i>TFPI</i>          | ILMN_1662619 | 2.505 | 5.30E-06  |
| 199. | <i>SIPA1L2</i>       | ILMN_1732923 | 2.415 | 1.00E-07  |
| 200. | <i>HIST1H2BJ</i>     | ILMN_1658702 | 1.91  | 0.0003385 |
| 201. | <i>CEACAM3</i>       | ILMN_1743570 | 2.145 | 0.0000015 |
| 202. | <i>SPHK1</i>         | ILMN_2357134 | 2.835 | 1.00E-07  |
| 203. | <i>MT1G</i>          | ILMN_1715401 | 2.285 | 4.00E-06  |
| 204. | <i>PLOD2</i>         | ILMN_2410924 | 1.825 | 1.75E-04  |
| 205. | <i>LOC729915</i>     | ILMN_3242786 | 3.195 | 4.57E-05  |
| 206. | <i>LOC100134822</i>  | ILMN_3239734 | 2.055 | 2.96E-05  |
| 207. | <i>ABLIM3</i>        | ILMN_1656940 | 3.165 | 1.00E-07  |
| 208. | <i>HIST1H2BC</i>     | ILMN_1680937 | 1.925 | 1.00E-07  |
| 209. | <i>TMEM51</i>        | ILMN_1674985 | 2.01  | 0.0003614 |
| 210. | <i>AQP12A</i>        | ILMN_1757036 | 2.305 | 0.0000009 |
| 211. | <i>HIST1H2BE</i>     | ILMN_1687947 | 2.85  | 1.00E-07  |
| 212. | <i>CA4</i>           | ILMN_1695157 | 1.88  | 8.87E-05  |
| 213. | <i>KIAA1881</i>      | ILMN_1852022 | 1.915 | 1.48E-04  |
| 214. | <i>MB21D1</i>        | ILMN_1706645 | 2.565 | 8.40E-06  |
| 215. | <i>PPAP2C</i>        | ILMN_1675523 | 1.765 | 4.72E-04  |
| 216. | <i>ELANE</i>         | ILMN_1706635 | 2.725 | 6.67E-05  |
| 217. | <i>MAZ</i>           | ILMN_1677997 | 2.375 | 1.00E-07  |
| 218. | <i>ASAP2</i>         | ILMN_3194508 | 2.055 | 1.00E-07  |
| 219. | <i>LOC642267</i>     | ILMN_1698519 | 1.845 | 9.30E-06  |
| 220. | <i>LOC100134728</i>  | ILMN_3240900 | 2.01  | 1.00E-07  |
| 221. | <i>LOC730953</i>     | ILMN_1658697 | 1.83  | 0.0002597 |
| 222. | <i>PSG9</i>          | ILMN_1801776 | 2.51  | 0.0000015 |
| 223. | <i>TNFSF13</i>       | ILMN_1784264 | 1.945 | 0.0001423 |
| 224. | <i>SLC2A3P2</i>      | ILMN_1806015 | 1.915 | 0.0000076 |
| 225. | <i>CASP7</i>         | ILMN_2373763 | 2.145 | 0.0000946 |
| 226. | <i>BCL6</i>          | ILMN_1746053 | 2.29  | 0.0000089 |
| 227. | <i>LIN7A</i>         | ILMN_1806293 | 3.01  | 1.00E-07  |
| 228. | <i>FAM160B1</i>      | ILMN_3182275 | 2.34  | 1.00E-07  |

|      |                     |              |       |           |
|------|---------------------|--------------|-------|-----------|
| 229. | <i>BEND7</i>        | ILMN_3230880 | 1.92  | 0.0003788 |
| 230. | <i>HIST2H3D</i>     | ILMN_3249188 | 2.435 | 0.0000066 |
| 231. | <i>ECM1</i>         | ILMN_2329735 | 1.8   | 0.0000003 |
| 232. | <i>F5</i>           | ILMN_1709233 | 1.775 | 0.0000023 |
| 233. | <i>LCN2</i>         | ILMN_1692223 | 2.365 | 0.0000099 |
| 234. | <i>CDH6</i>         | ILMN_1766675 | 2.355 | 0.0000081 |
| 235. | <i>TRIM6</i>        | ILMN_1656910 | 2.62  | 0.000023  |
| 236. | <i>C3AR1</i>        | ILMN_1787529 | 1.78  | 0.0000212 |
| 237. | <i>DEFA1</i>        | ILMN_2193213 | 2.725 | 0.0000808 |
| 238. | <i>TSPAN9</i>       | ILMN_1729453 | 1.9   | 0.0001377 |
| 239. | <i>TRPM2</i>        | ILMN_2352380 | 2.32  | 0.0001445 |
| 240. | <i>LOC653867</i>    | ILMN_1678633 | 1.91  | 0.0000178 |
| 241. | <i>SLA</i>          | ILMN_2291954 | 1.84  | 0.0003179 |
| 242. | <i>CETP</i>         | ILMN_2098013 | 2.395 | 0.0000005 |
| 243. | <i>S100A12</i>      | ILMN_1748915 | 2.88  | 1.00E-07  |
| 244. | <i>MCMBP</i>        | ILMN_1761411 | 2.36  | 1.00E-07  |
| 245. | <i>OPLAH</i>        | ILMN_1711030 | 2.945 | 1.00E-07  |
| 246. | <i>ITGB5</i>        | ILMN_2311166 | 2.05  | 0.0003537 |
| 247. | <i>CXCL10</i>       | ILMN_1791759 | 2.26  | 0.00001   |
| 248. | <i>IFI44</i>        | ILMN_1760062 | 2.865 | 1.00E-07  |
| 249. | <i>DENND1A</i>      | ILMN_1728073 | 2.115 | 7.83E-05  |
| 250. | <i>KAZN</i>         | ILMN_1798458 | 2.19  | 1.70E-06  |
| 251. | <i>GNG11</i>        | ILMN_1782419 | 1.93  | 1.00E-07  |
| 252. | <i>TMC4</i>         | ILMN_1803219 | 2.615 | 8.00E-07  |
| 253. | <i>SAMD14</i>       | ILMN_1760688 | 2.605 | 1.69E-04  |
| 254. | <i>BPI</i>          | ILMN_1766736 | 2.965 | 4.40E-06  |
| 255. | <i>HIST1H2BG</i>    | ILMN_1716195 | 2.665 | 5.40E-06  |
| 256. | <i>SMPDL3A</i>      | ILMN_1796349 | 1.96  | 2.00E-07  |
| 257. | <i>B3GNT8</i>       | ILMN_1741389 | 1.705 | 5.17E-04  |
| 258. | <i>F13A1</i>        | ILMN_1717163 | 2.02  | 1.00E-07  |
| 259. | <i>GUCY1A3</i>      | ILMN_2131177 | 1.675 | 2.76E-04  |
| 260. | <i>EGF</i>          | ILMN_1690733 | 2.215 | 4.60E-06  |
| 261. | <i>STEAP4</i>       | ILMN_1772036 | 2.295 | 1.00E-07  |
| 262. | <i>KRT75</i>        | ILMN_1721247 | 2.09  | 1.86E-04  |
| 263. | <i>CLEC5A</i>       | ILMN_1780465 | 2.89  | 9.81E-05  |
| 264. | <i>TGFB11I</i>      | ILMN_2389876 | 2.205 | 1.00E-04  |
| 265. | <i>CMTM5</i>        | ILMN_1775373 | 1.89  | 2.65E-05  |
| 266. | <i>TECPR2</i>       | ILMN_1764456 | 2.755 | 3.38E-05  |
| 267. | <i>PFKFB2</i>       | ILMN_1723436 | 1.945 | 6.70E-05  |
| 268. | <i>IFI6</i>         | ILMN_2347798 | 1.815 | 4.29E-05  |
| 269. | <i>GBP3</i>         | ILMN_1725314 | 2.84  | 3.85E-06  |
| 270. | <i>LOC653600</i>    | ILMN_1693262 | 3.59  | 1.77E-04  |
| 271. | <i>LOC648733</i>    | ILMN_1668588 | 1.97  | 1.65E-05  |
| 272. | <i>LOC100130904</i> | ILMN_3185147 | 2.96  | 1.65E-06  |
| 273. | <i>CECR6</i>        | ILMN_1702229 | 1.86  | 1.90E-06  |
| 274. | <i>LOC100132317</i> | ILMN_3241912 | 2.465 | 7.65E-06  |
| 275. | <i>MCTP2</i>        | ILMN_1792682 | 2.28  | 2.50E-07  |
| 276. | <i>FYB</i>          | ILMN_2280548 | 2.94  | 1.00E-07  |
| 277. | <i>FAM153B</i>      | ILMN_1736819 | 2.21  | 9.00E-07  |
| 278. | <i>DDX60</i>        | ILMN_1795181 | 1.85  | 2.00E-07  |
| 279. | <i>LOC100133077</i> | ILMN_3287106 | 2.35  | 4.20E-06  |
| 280. | <i>MEF2A</i>        | ILMN_1661888 | 2.25  | 1.16E-05  |
| 281. | <i>MXII</i>         | ILMN_1794074 | 2.975 | 2.50E-07  |
| 282. | <i>C1GALT1C1</i>    | ILMN_2401730 | 2.34  | 4.00E-07  |
| 283. | <i>PTPN20</i>       | ILMN_1680945 | 2.13  | 4.57E-05  |
| 284. | <i>MMP9</i>         | ILMN_1796316 | 2.405 | 3.50E-07  |
| 285. | <i>ERLIN1</i>       | ILMN_1730731 | 2.015 | 2.76E-05  |
| 286. | <i>LOC642120</i>    | ILMN_1659639 | 2.015 | 1.05E-05  |

|      |                     |              |       |          |
|------|---------------------|--------------|-------|----------|
| 287. | <i>CLEC1A</i>       | ILMN_1691339 | 2.385 | 3.15E-06 |
| 288. | <i>RPS6KA3</i>      | ILMN_1652736 | 1.35  | 2.05E-04 |
| 289. | <i>LOXL3</i>        | ILMN_1733515 | 2.385 | 4.00E-07 |
| 290. | <i>PPBP</i>         | ILMN_1767281 | 2.055 | 1.00E-07 |
| 291. | <i>ARG2</i>         | ILMN_1800898 | 2.06  | 2.40E-06 |
| 292. | <i>BACH1</i>        | ILMN_1807181 | 2.605 | 1.00E-07 |
| 293. | <i>ASPRV1</i>       | ILMN_1762284 | 1.835 | 1.79E-04 |
| 294. | <i>LILRA6</i>       | ILMN_1694243 | 2.07  | 8.95E-06 |
| 295. | <i>LOC100129904</i> | ILMN_3259736 | 2.03  | 6.94E-05 |
| 296. | <i>GPER1</i>        | ILMN_1795298 | 2.93  | 1.70E-06 |
| 297. | <i>ADGRG3</i>       | ILMN_1765941 | 1.665 | 1.20E-04 |
| 298. | <i>LOC650546</i>    | ILMN_1814812 | 2.025 | 2.00E-06 |
| 299. | <i>IFI44L</i>       | ILMN_1723912 | 2.76  | 2.06E-04 |
| 300. | <i>PF4V1</i>        | ILMN_1745522 | 2.07  | 2.57E-05 |
| 301. | <i>GLT1D1</i>       | ILMN_1656327 | 1.835 | 1.15E-04 |
| 302. | <i>NUDT16P1</i>     | ILMN_1716468 | 2.25  | 1.43E-04 |
| 303. | <i>PNKD</i>         | ILMN_1774604 | 1.78  | 5.29E-05 |
| 304. | <i>IFIT2</i>        | ILMN_1739428 | 1.965 | 1.00E-07 |
| 305. | <i>ELF2</i>         | ILMN_2252295 | 2.875 | 1.50E-06 |
| 306. | <i>SLC22A16</i>     | ILMN_1763609 | 3.095 | 1.00E-07 |
| 307. | <i>YOD1</i>         | ILMN_1678919 | 2.135 | 4.05E-06 |
| 308. | <i>NDUFV3</i>       | ILMN_2387731 | 2.11  | 1.05E-05 |
| 309. | <i>XK</i>           | ILMN_1759117 | 2.575 | 1.98E-04 |
| 310. | <i>MBOAT2</i>       | ILMN_1777853 | 1.94  | 9.43E-05 |
| 311. | <i>CAV2</i>         | ILMN_2360730 | 1.69  | 1.19E-04 |
| 312. | <i>ADORA2B</i>      | ILMN_1703946 | 2.04  | 6.80E-06 |
| 313. | <i>LRP1</i>         | ILMN_1669772 | 2.125 | 1.08E-04 |
| 314. | <i>EPHB1</i>        | ILMN_1692261 | 1.175 | 2.76E-04 |
| 315. | <i>LSMEM1</i>       | ILMN_1804895 | 2.365 | 5.30E-06 |
| 316. | <i>EVI2A</i>        | ILMN_2369018 | 3.13  | 1.00E-07 |
| 317. | <i>SH3BGRL2</i>     | ILMN_1762764 | 1.745 | 7.00E-06 |
| 318. | <i>ESAM</i>         | ILMN_1668092 | 1.835 | 2.47E-04 |
| 319. | <i>FRMD4B</i>       | ILMN_1700143 | 2.13  | 6.85E-06 |
| 320. | <i>LOC100131360</i> | ILMN_3215367 | 1.7   | 5.54E-05 |
| 321. | <i>C4orf32</i>      | ILMN_2069821 | 1.975 | 4.29E-05 |
| 322. | <i>MANSC1</i>       | ILMN_2142752 | 2.11  | 1.10E-05 |
| 323. | <i>UBE2C</i>        | ILMN_2301083 | 1.88  | 1.53E-04 |
| 324. | <i>TPM1</i>         | ILMN_2360710 | 1.7   | 1.20E-05 |
| 325. | <i>ATG3</i>         | ILMN_2163732 | 1.77  | 1.57E-05 |
| 326. | <i>C9orf72</i>      | ILMN_1666742 | 1.87  | 2.15E-05 |
| 327. | <i>SPTB</i>         | ILMN_1782845 | 2.27  | 8.96E-05 |
| 328. | <i>LEPR</i>         | ILMN_2234956 | 1.885 | 2.32E-05 |
| 329. | <i>PROK1</i>        | ILMN_1716259 | 2.075 | 1.30E-05 |
| 330. | <i>PEAR1</i>        | ILMN_2407669 | 2.17  | 1.36E-05 |
| 331. | <i>PGLYRP1</i>      | ILMN_1704870 | 1.68  | 1.68E-04 |
| 332. | <i>LOC642103</i>    | ILMN_1712999 | 1.725 | 1.71E-04 |
| 333. | <i>METTL9</i>       | ILMN_2402629 | 2.725 | 1.00E-07 |
| 334. | <i>CALD1</i>        | ILMN_1730487 | 2.5   | 1.00E-07 |
| 335. | <i>IFIT5</i>        | ILMN_1696654 | 1.83  | 3.25E-05 |
| 336. | <i>HIST2H4B</i>     | ILMN_3238233 | 1.64  | 1.30E-04 |
| 337. | <i>SERPINB8</i>     | ILMN_2397028 | 2     | 2.60E-05 |
| 338. | <i>LGALS1</i>       | ILMN_1673548 | 2.345 | 1.00E-07 |
| 339. | <i>FBLN1</i>        | ILMN_1700541 | 2.72  | 2.76E-05 |
| 340. | <i>MS4A4E</i>       | ILMN_3200211 | 1.81  | 4.12E-05 |
| 341. | <i>SIPR3</i>        | ILMN_1703531 | 2.28  | 3.16E-05 |
| 342. | <i>HNMT</i>         | ILMN_1705984 | 1.95  | 4.59E-05 |
| 343. | <i>LPGAT1</i>       | ILMN_2151277 | 1.855 | 3.75E-05 |
| 344. | <i>UBFD1</i>        | ILMN_1700811 | 1.89  | 5.60E-05 |

|      |                  |              |       |          |
|------|------------------|--------------|-------|----------|
| 345. | <i>H3.Y</i>      | ILMN_3278627 | 1.805 | 2.12E-04 |
| 346. | <i>MSI2</i>      | ILMN_1713088 | 1.875 | 4.36E-05 |
| 347. | <i>ABCC4</i>     | ILMN_2194009 | 2.33  | 1.00E-07 |
| 348. | <i>TMEM88</i>    | ILMN_1757129 | 1.78  | 1.98E-04 |
| 349. | <i>CTNNAL1</i>   | ILMN_2136446 | 2.01  | 4.68E-05 |
| 350. | <i>OLR1</i>      | ILMN_1723035 | 2.64  | 5.83E-05 |
| 351. | <i>MIR219A2</i>  | ILMN_3311015 | 1.66  | 1.21E-04 |
| 352. | <i>KIFC3</i>     | ILMN_1710354 | 2.575 | 1.00E-07 |
| 353. | <i>ACVRL1</i>    | ILMN_3250257 | 1.915 | 6.99E-05 |
| 354. | <i>TRIM9</i>     | ILMN_1763433 | 2.085 | 7.09E-05 |
| 355. | <i>MGAM</i>      | ILMN_1714643 | 1.66  | 1.31E-04 |
| 356. | <i>MS4A3</i>     | ILMN_1695530 | 1.86  | 7.69E-05 |
| 357. | <i>HOXA9</i>     | ILMN_1739582 | 1.835 | 1.40E-04 |
| 358. | <i>TRPM6</i>     | ILMN_1814296 | 1.825 | 1.29E-04 |
| 359. | <i>SAMSN1</i>    | ILMN_2171289 | 2.03  | 1.44E-04 |
| 360. | <i>ARL11</i>     | ILMN_1808383 | 1.78  | 1.55E-04 |
| 361. | <i>LOC650261</i> | ILMN_1729635 | 1.79  | 1.63E-04 |
| 362. | <i>GRIK1</i>     | ILMN_1651817 | 1.68  | 2.32E-04 |
| 363. | <i>HIST1H2AD</i> | ILMN_1742143 | 1.865 | 1.97E-04 |
| 364. | <i>FBXL13</i>    | ILMN_1791253 | 1.725 | 2.12E-04 |
| 365. | <i>SYTL4</i>     | ILMN_1719599 | 1.995 | 2.19E-04 |
| 366. | <i>REPS2</i>     | ILMN_1724668 | 1.845 | 2.78E-04 |
| 367. | <i>BCAT1</i>     | ILMN_1766169 | 2.62  | 1.00E-07 |
| 368. | <i>CLEC1B</i>    | ILMN_1745103 | 3.925 | 1.00E-07 |
| 369. | <i>HEPACAM2</i>  | ILMN_2388263 | 2.095 | 2.36E-04 |
| 370. | <i>TP53I3</i>    | ILMN_2358919 | 2.03  | 2.49E-04 |
| 371. | <i>MRPL35</i>    | ILMN_1753016 | 1.195 | 2.60E-04 |
| 372. | <i>ARG1</i>      | ILMN_1812281 | 2.625 | 2.77E-04 |
| 373. | <i>ACSL3</i>     | ILMN_1666096 | 1.76  | 3.29E-04 |
| 374. | <i>CLEC12A</i>   | ILMN_2292178 | 1.995 | 3.02E-04 |
| 375. | <i>RHCE</i>      | ILMN_2408663 | 2.14  | 7.02E-04 |
| 376. | <i>SPARC</i>     | ILMN_1796734 | 1.79  | 3.81E-04 |
| 377. | <i>HERC5</i>     | ILMN_1729749 | 1.625 | 4.96E-04 |

**ATB vs LTB down regulated genes common to South Africa & Malawi.**

| <b>S.no</b> | <b>Gene</b>     | <b>Probset ID</b> | <b>Mean fold change</b> | <b>Mean P-value</b> |
|-------------|-----------------|-------------------|-------------------------|---------------------|
| 1.          | <i>NDRG2</i>    | ILMN_2361603      | 2.17                    | 1E-07               |
| 2.          | <i>KLF12</i>    | ILMN_1762801      | 2.77                    | 1.4E-06             |
| 3.          | <i>ANO9</i>     | ILMN_1798679      | 4.05                    | 1E-07               |
| 4.          | <i>CD79A</i>    | ILMN_1659227      | 3.80                    | 1E-07               |
| 5.          | <i>FCGBP</i>    | ILMN_2302757      | 3.64                    | 1E-07               |
| 6.          | <i>GZMK</i>     | ILMN_1710734      | 2.22                    | 1E-07               |
| 7.          | <i>CXCR3</i>    | ILMN_1797975      | 2.27                    | 1E-07               |
| 8.          | <i>MIEF2</i>    | ILMN_1815923      | 2.06                    | 4.2E-06             |
| 9.          | <i>CXCR5</i>    | ILMN_2337928      | 2.86                    | 1E-07               |
| 10.         | <i>CD27</i>     | ILMN_1688959      | 2.15                    | 1E-07               |
| 11.         | <i>RPL31P43</i> | ILMN_3276676      | 2.73                    | 1E-07               |
| 12.         | <i>FAM159A</i>  | ILMN_2185675      | 2.63                    | 1E-07               |
| 13.         | <i>HPCAL4</i>   | ILMN_1736976      | 2.07                    | 1E-07               |
| 14.         | <i>RLTPR</i>    | ILMN_1746138      | 2.92                    | 1E-07               |
| 15.         | <i>COL9A2</i>   | ILMN_1685122      | 3.48                    | 1E-07               |
| 16.         | <i>FAM102A</i>  | ILMN_1745112      | 2.85                    | 1E-07               |
| 17.         | <i>DNHD1</i>    | ILMN_1810267      | 2.74                    | 1E-07               |
| 18.         | <i>ID3</i>      | ILMN_1732296      | 2.86                    | 1E-07               |
| 19.         | <i>TCF7</i>     | ILMN_1676470      | 2.70                    | 1E-07               |
| 20.         | <i>LAMA5</i>    | ILMN_1773567      | 2.21                    | 6E-07               |
| 21.         | <i>CARNS1</i>   | ILMN_1725746      | 2.41                    | 1E-07               |
| 22.         | <i>TNFRSF25</i> | ILMN_1765109      | 2.18                    | 1E-07               |

|     |                  |              |      |       |
|-----|------------------|--------------|------|-------|
| 23. | <i>NCR3</i>      | ILMN_2044471 | 2.74 | 1E-07 |
| 24. | <i>CRIP2</i>     | ILMN_1694432 | 4.17 | 1E-07 |
| 25. | <i>SFI1</i>      | ILMN_1763887 | 2.10 | 4E-05 |
| 26. | <i>PLXNA3</i>    | ILMN_1719972 | 2.49 | 3E-07 |
| 27. | <i>HIP1R</i>     | ILMN_2396148 | 2.51 | 2E-07 |
| 28. | <i>MAP4K1</i>    | ILMN_2365111 | 3.03 | 2E-07 |
| 29. | <i>LRRN3</i>     | ILMN_1773650 | 3.07 | 2E-07 |
| 30. | <i>CLIC5</i>     | ILMN_1778964 | 2.84 | 2E-07 |
| 31. | <i>FCRLA</i>     | ILMN_1691071 | 2.59 | 2E-07 |
| 32. | <i>FAM129C</i>   | ILMN_1664063 | 2.17 | 2E-07 |
| 33. | <i>RTKN</i>      | ILMN_1680591 | 2.21 | 3E-07 |
| 34. | <i>CD19</i>      | ILMN_1782704 | 2.35 | 3E-07 |
| 35. | <i>HRK</i>       | ILMN_2193706 | 4.35 | 4E-07 |
| 36. | <i>PKD1</i>      | ILMN_2339028 | 2.49 | 2E-06 |
| 37. | <i>EPHA4</i>     | ILMN_1672022 | 2.09 | 4E-07 |
| 38. | <i>IL11RA</i>    | ILMN_1720024 | 2.38 | 5E-07 |
| 39. | <i>GPR68</i>     | ILMN_1671142 | 2.49 | 1E-06 |
| 40. | <i>SPIB</i>      | ILMN_2143314 | 2.63 | 6E-07 |
| 41. | <i>C2orf40</i>   | ILMN_1676822 | 2.08 | 7E-07 |
| 42. | <i>SCML4</i>     | ILMN_1747436 | 2.67 | 8E-07 |
| 43. | <i>EMC3-AS1</i>  | ILMN_3289346 | 2.53 | 1E-06 |
| 44. | <i>NFATC3</i>    | ILMN_1685810 | 2.48 | 9E-06 |
| 45. | <i>DIP2C</i>     | ILMN_1676062 | 2.10 | 1E-06 |
| 46. | <i>EPHB6</i>     | ILMN_1802646 | 2.16 | 2E-06 |
| 47. | <i>FCRL2</i>     | ILMN_1665152 | 2.15 | 2E-06 |
| 48. | <i>OSBPL10</i>   | ILMN_1669497 | 5.05 | 2E-06 |
| 49. | <i>LINC01550</i> | ILMN_3247639 | 2.18 | 3E-06 |
| 50. | <i>DTX3</i>      | ILMN_1658677 | 2.50 | 4E-06 |
| 51. | <i>TLE2</i>      | ILMN_1814917 | 2.64 | 4E-06 |
| 52. | <i>FLNB</i>      | ILMN_1664922 | 2.14 | 4E-06 |
| 53. | <i>MATK</i>      | ILMN_1669321 | 2.18 | 4E-05 |
| 54. | <i>LRRC26</i>    | ILMN_2249018 | 2.19 | 5E-06 |
| 55. | <i>PCNXL2</i>    | ILMN_2295918 | 2.16 | 5E-06 |
| 56. | <i>PFNIP3</i>    | ILMN_1676016 | 2.15 | 7E-06 |
| 57. | <i>HAUS5</i>     | ILMN_3247504 | 2.18 | 7E-06 |
| 58. | <i>LINC00926</i> | ILMN_3236036 | 2.94 | 7E-06 |
| 59. | <i>CA11</i>      | ILMN_1743219 | 2.30 | 7E-06 |
| 60. | <i>PNOC</i>      | ILMN_1676003 | 2.15 | 8E-06 |
| 61. | <i>AEBP1</i>     | ILMN_1736178 | 2.25 | 8E-06 |
| 62. | <i>WDR86</i>     | ILMN_1700248 | 2.11 | 1E-05 |
| 63. | <i>NBL1</i>      | ILMN_1789599 | 2.12 | 1E-05 |
| 64. | <i>FAM153C</i>   | ILMN_1733983 | 2.11 | 6E-05 |
| 65. | <i>SIRPG</i>     | ILMN_1676780 | 2.40 | 1E-05 |
| 66. | <i>RTBDN</i>     | ILMN_2384405 | 2.35 | 1E-05 |
| 67. | <i>EBF1</i>      | ILMN_1778681 | 5.63 | 1E-05 |
| 68. | <i>WNT7A</i>     | ILMN_1778575 | 2.13 | 2E-05 |
| 69. | <i>TJP3</i>      | ILMN_1659610 | 2.73 | 3E-05 |
| 70. | <i>HTR3A</i>     | ILMN_2371079 | 2.26 | 3E-05 |
| 71. | <i>PARM1</i>     | ILMN_1656560 | 2.31 | 4E-05 |
| 72. | <i>LOC90925</i>  | ILMN_1794927 | 2.69 | 4E-05 |
| 73. | <i>DKK3</i>      | ILMN_2398159 | 2.16 | 4E-05 |
| 74. | <i>TNFRSF13C</i> | ILMN_1731742 | 3.63 | 4E-05 |
| 75. | <i>HABP4</i>     | ILMN_2107991 | 2.72 | 5E-05 |
| 76. | <i>RNF214</i>    | ILMN_1800420 | 2.23 | 5E-05 |
| 77. | <i>VPREB3</i>    | ILMN_1700147 | 3.89 | 5E-05 |
| 78. | <i>BLK</i>       | ILMN_1668277 | 2.81 | 6E-05 |
| 79. | <i>MSC</i>       | ILMN_1741404 | 2.09 | 3E-04 |
| 80. | <i>GGTLC1</i>    | ILMN_1680730 | 2.31 | 6E-05 |



|      |                     |              |          |          |
|------|---------------------|--------------|----------|----------|
| 81.  | <i>SFMBT1</i>       | ILMN_2391750 | 2.47     | 6E-05    |
| 82.  | <i>LAMB2P1</i>      | ILMN_3242152 | 2.04     | 6E-05    |
| 83.  | <i>SPNS3</i>        | ILMN_1668984 | 2.19     | 6E-05    |
| 84.  | <i>CD8B</i>         | ILMN_2354191 | 2.17     | 3E-04    |
| 85.  | <i>IL23A</i>        | ILMN_1715603 | 2.14     | 7E-05    |
| 86.  | <i>C11orf80</i>     | ILMN_1790637 | 2.70     | 7E-05    |
| 87.  | <i>PAQR7</i>        | ILMN_1746618 | 2.12     | 7E-05    |
| 88.  | <i>LOC100133866</i> | ILMN_3246538 | 2.15     | 9E-05    |
| 89.  | <i>MEGF6</i>        | ILMN_3241441 | 2.15     | 1E-04    |
| 90.  | <i>CEP68</i>        | ILMN_1808500 | 2.24     | 1E-04    |
| 91.  | <i>MS4A1</i>        | ILMN_1776939 | 2.27     | 1E-04    |
| 92.  | <i>LARGE</i>        | ILMN_1662038 | 2.49     | 1E-04    |
| 93.  | <i>CSNK1E</i>       | ILMN_1708858 | 2.47     | 2E-04    |
| 94.  | <i>CKB</i>          | ILMN_1671478 | 2.27     | 2E-04    |
| 95.  | <i>SAMD3</i>        | ILMN_2343618 | 2.04     | 2E-04    |
| 96.  | <i>TCL1A</i>        | ILMN_1788841 | 2.62     | 2E-04    |
| 97.  | <i>KRII</i>         | ILMN_1751395 | 2.05     | 3E-04    |
| 98.  | <i>GOLGA8A</i>      | ILMN_1712469 | 1.851852 | 1.93E-05 |
| 99.  | <i>MORN3</i>        | ILMN_1777934 | 1.904762 | 2.00E-07 |
| 100. | <i>PLCH2</i>        | ILMN_2061565 | 1.785714 | 4.41E-05 |
| 101. | <i>GNLY</i>         | ILMN_2256295 | 1.904762 | 1.13E-04 |
| 102. | <i>ZC4H2</i>        | ILMN_3248906 | 1.818182 | 2.70E-06 |
| 103. | <i>PASK</i>         | ILMN_1754858 | 1.960784 | 2.40E-06 |
| 104. | <i>NTN5</i>         | ILMN_1767343 | 1.626016 | 2.25E-04 |
| 105. | <i>OCM2</i>         | ILMN_3240349 | 1.923077 | 4.75E-05 |
| 106. | <i>TIGIT</i>        | ILMN_2125017 | 1.869159 | 1.94E-04 |
| 107. | <i>BDH1</i>         | ILMN_1799280 | 1.6      | 1.94E-05 |
| 108. | <i>MMP11</i>        | ILMN_1655915 | 1.801802 | 5.80E-06 |
| 109. | <i>ZCCHC18</i>      | ILMN_3214625 | 1.680672 | 5.45E-06 |
| 110. | <i>FBLN5</i>        | ILMN_1664176 | 1.801802 | 9.60E-06 |
| 111. | <i>KIF5C</i>        | ILMN_2212999 | 1.960784 | 1.36E-04 |
| 112. | <i>CCL28</i>        | ILMN_1701347 | 1.818182 | 2.55E-04 |
| 113. | <i>CD8A</i>         | ILMN_1760374 | 1.574803 | 4.52E-05 |
| 114. | <i>CAMTA1</i>       | ILMN_1661940 | 1.818182 | 2.51E-05 |
| 115. | <i>TPM2</i>         | ILMN_1757604 | 1.960784 | 2.42E-05 |
| 116. | <i>SLC29A2</i>      | ILMN_1730809 | 2.061856 | 3.80E-05 |
| 117. | <i>C3orf18</i>      | ILMN_1728581 | 1.851852 | 3.11E-05 |
| 118. | <i>PLXNA1</i>       | ILMN_1791569 | 1.923077 | 4.87E-05 |
| 119. | <i>PDE8B</i>        | ILMN_2301722 | 1.941748 | 2.71E-05 |
| 120. | <i>NEURL4</i>       | ILMN_2407811 | 1.980198 | 4.04E-05 |
| 121. | <i>IFNLR1</i>       | ILMN_1680805 | 1.904762 | 4.61E-05 |
| 122. | <i>GPR183</i>       | ILMN_2168217 | 1.904762 | 8.72E-05 |
| 123. | <i>ZNF589</i>       | ILMN_1654612 | 1.923077 | 5.00E-05 |
| 124. | <i>CNTNAP1</i>      | ILMN_1692398 | 1.785714 | 5.96E-05 |
| 125. | <i>CD72</i>         | ILMN_1723004 | 1.886792 | 5.43E-05 |
| 126. | <i>SNORD83B</i>     | ILMN_3244157 | 1.639344 | 4.27E-04 |
| 127. | <i>WNT10B</i>       | ILMN_1712283 | 1.785714 | 6.09E-05 |
| 128. | <i>BZRAP1</i>       | ILMN_2111229 | 1.666667 | 2.20E-04 |
| 129. | <i>RORC</i>         | ILMN_1771126 | 1.960784 | 1.80E-04 |
| 130. | <i>MIR124-2HG</i>   | ILMN_3269119 | 1.6      | 7.09E-05 |
| 131. | <i>KIR3DL3</i>      | ILMN_2082593 | 1.785714 | 1.07E-04 |
| 132. | <i>KIR2DL3</i>      | ILMN_1667232 | 1.652893 | 3.62E-04 |
| 133. | <i>PNMA3</i>        | ILMN_1783805 | 1.666667 | 1.17E-04 |
| 134. | <i>PPAN</i>         | ILMN_1798459 | 1.923077 | 1.40E-04 |
| 135. | <i>AHDC1</i>        | ILMN_1680111 | 1.851852 | 1.40E-04 |
| 136. | <i>TPPP3</i>        | ILMN_1797744 | 1.941748 | 1.72E-04 |
| 137. | <i>SYTL2</i>        | ILMN_2336609 | 1.652893 | 3.79E-04 |
| 138. | <i>APBA2</i>        | ILMN_1723626 | 2        | 1.94E-04 |

|      |                     |              |          |          |
|------|---------------------|--------------|----------|----------|
| 139. | <i>ESPNL</i>        | ILMN_2115862 | 1.754386 | 2.06E-04 |
| 140. | <i>OBSCN</i>        | ILMN_1749667 | 1.923077 | 2.30E-04 |
| 141. | <i>KLKB1</i>        | ILMN_1800468 | 1.754386 | 4.46E-04 |
| 142. | <i>CACNA1H</i>      | ILMN_1671263 | 1.818182 | 1.70E-04 |
| 143. | <i>PPP2R5D</i>      | ILMN_2359887 | 1.818182 | 2.99E-04 |
| 144. | <i>SMC1A</i>        | ILMN_1652006 | 1.680672 | 6.02E-05 |
| 145. | <i>LOC654113</i>    | ILMN_1813114 | 1.818182 | 2.36E-05 |
| 146. | <i>LOC728452</i>    | ILMN_1722223 | 2.083333 | 1.10E-06 |
| 147. | <i>LOC100133930</i> | ILMN_3241957 | 1.785714 | 2.54E-05 |
| 148. | <i>LOC643695</i>    | ILMN_1653198 | 1.724138 | 9.82E-05 |
| 149. | <i>LOC441528</i>    | ILMN_1703881 | 1.639344 | 1.62E-04 |
| 150. | <i>LOC649917</i>    | ILMN_3205424 | 1.923077 | 1.03E-04 |
| 151. | <i>LOC400464</i>    | ILMN_1786168 | 1.904762 | 1.16E-04 |
| 152. | <i>LOC729985</i>    | ILMN_1710220 | 1.6      | 5.74E-04 |
| 153. | <i>LOC391157</i>    | ILMN_1802963 | 1.869159 | 1.50E-04 |
